# Supplementary material for: UV-triggered thiol–disulfide exchange reaction towards tailored biodegradable hydrogels
Source: Royal Society of Chemistry journal article supplement (doi:10.1039/c5py01925g), 2016-01-01
Supplement: c5py01925g1.pdf [file c5py01925g1.pdf]

## Supporting Information

# UV-Triggered thiol-disulfide exchange reaction towards tailored biodegradable hydrogels

*Linlin Wang,<sup>a</sup> Lei Li,<sup>b</sup> Xing Wang,<sup>a</sup> Da Huang,<sup>a</sup> Fei Yang,<sup>a</sup> Hong Shen,<sup>a</sup> Zichen Li<sup>b</sup> and  
Decheng Wu<sup>\*a</sup>*

<sup>a</sup> Beijing National Laboratory for Molecular Sciences, State Key Laboratory of Polymer Physics & Chemistry, Institute of Chemistry, Chinese Academy of Sciences, Beijing 100190, China

<sup>b</sup> Beijing National Laboratory for Molecular Sciences (BNLMS), Key Laboratory of Polymer Chemistry & Physics of Ministry of Education, Department of Polymer Science & Engineering, College of Chemistry and Molecular Engineering, Peking University, Beijing 100871, China

\* Corresponding author:

E-mail: [dcwu@iccas.ac.cn](mailto:dcwu@iccas.ac.cn)

Tel: +86-10-8261-1492

Fax: +86-10-8261-1492

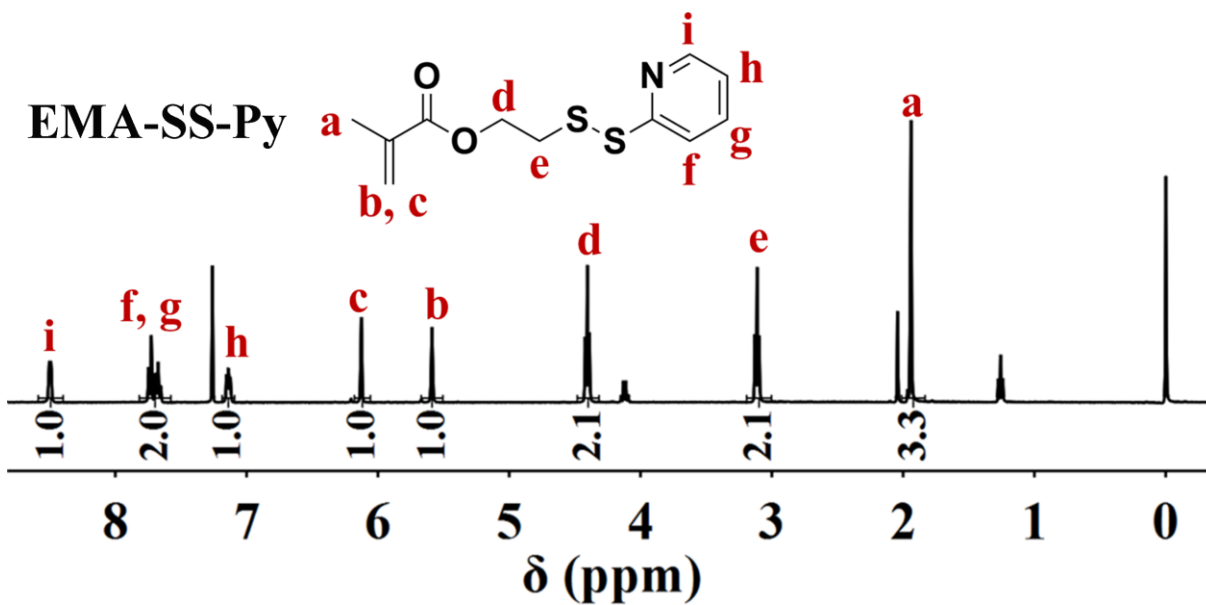

Figure S1.  $^1\text{H}$  NMR spectrum of EMA-SS-Py in  $\text{CDCl}_3$ .

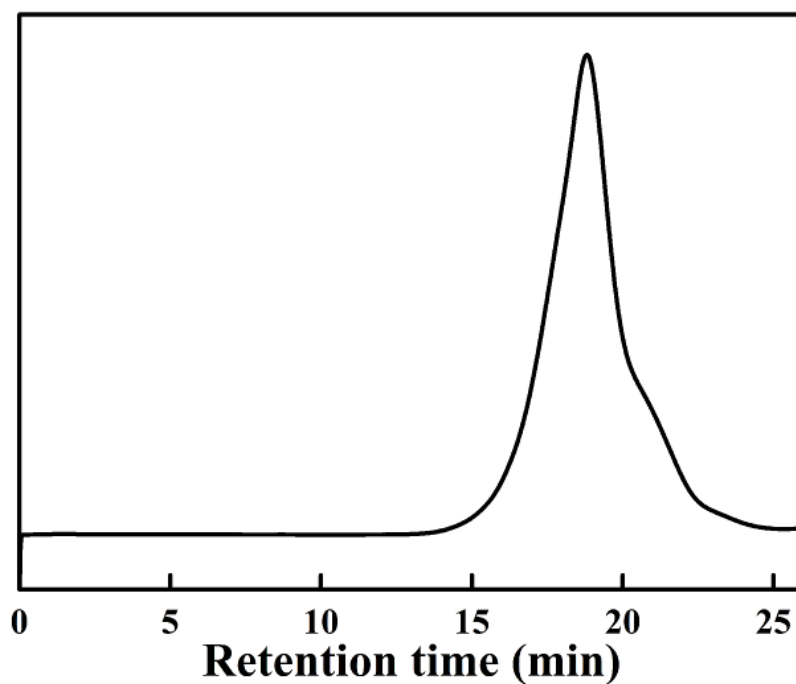

Figure S2. GPC curve of P(EMA-SS-PEG).

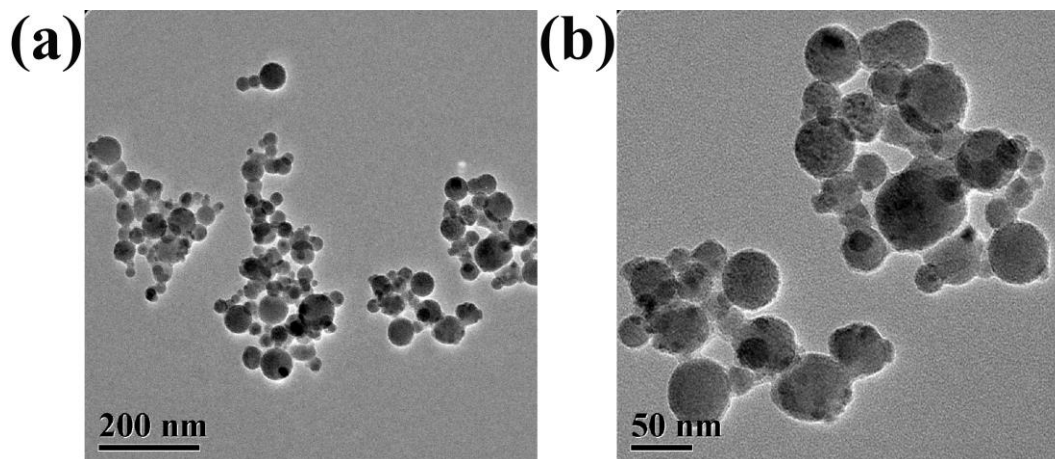

**Figure S3.** TEM images of nanoaggregates with mcelle-like structures after 30 min gelation.

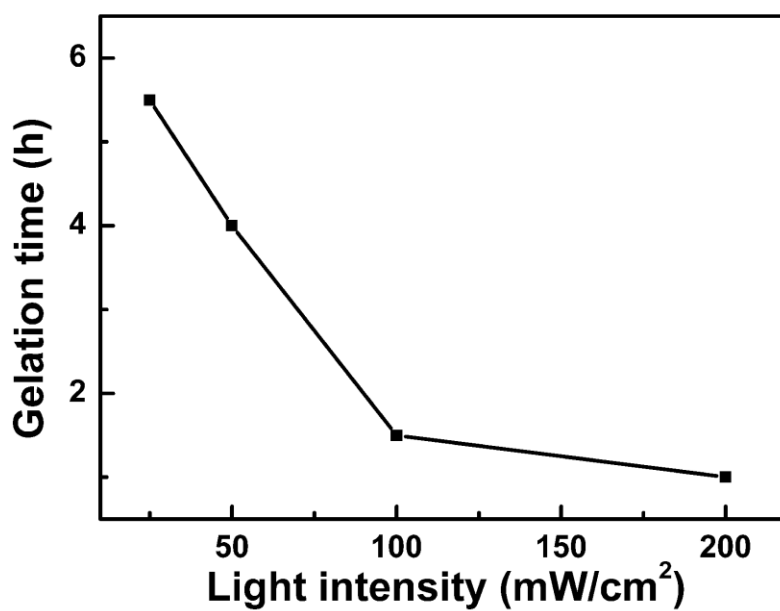

**Figure S4.** The gelation time of hydrogels under various UV intensities.

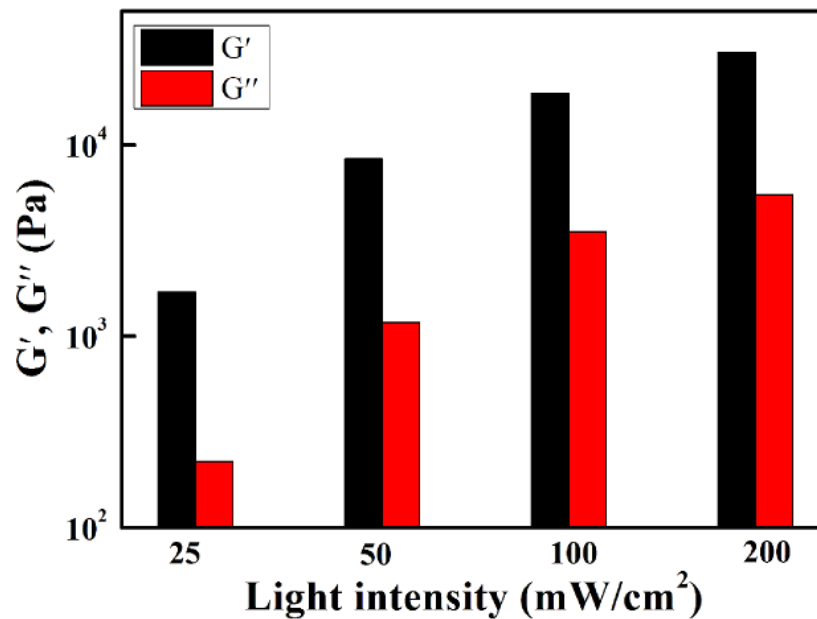

**Figure S5.** Elastic ( $G'$ ) and viscous ( $G''$ ) moduli of hydrogels with radiation times of 6 h under diverse UV light intensities.

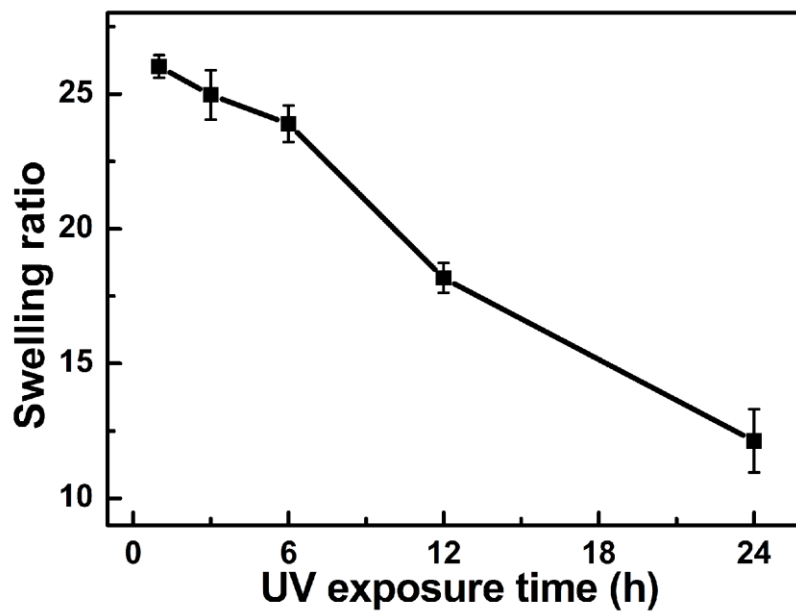

**Figure S6.** Swelling ratio of hydrogels with irradiation of diverse hours.

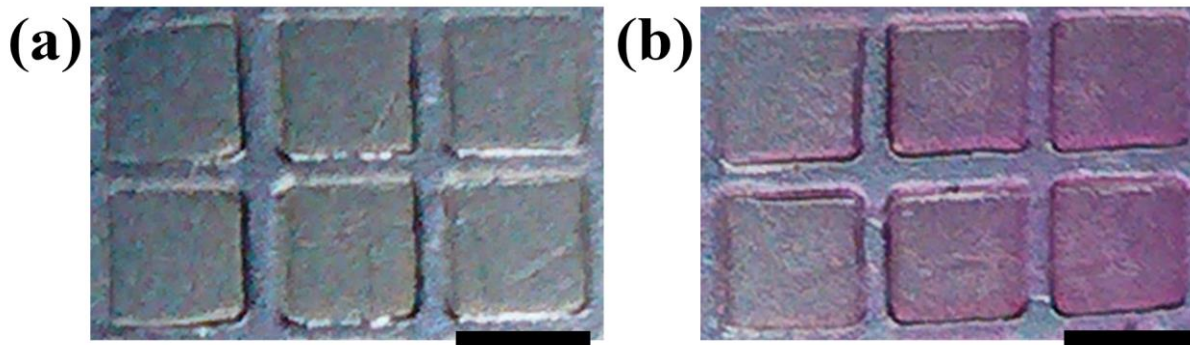

**Figure S7.** Images of the patterned hydrogels on silicon wafer (a) without and (b) with RB dye under the UV exposure of 10 min (Scale bar = 2 mm).

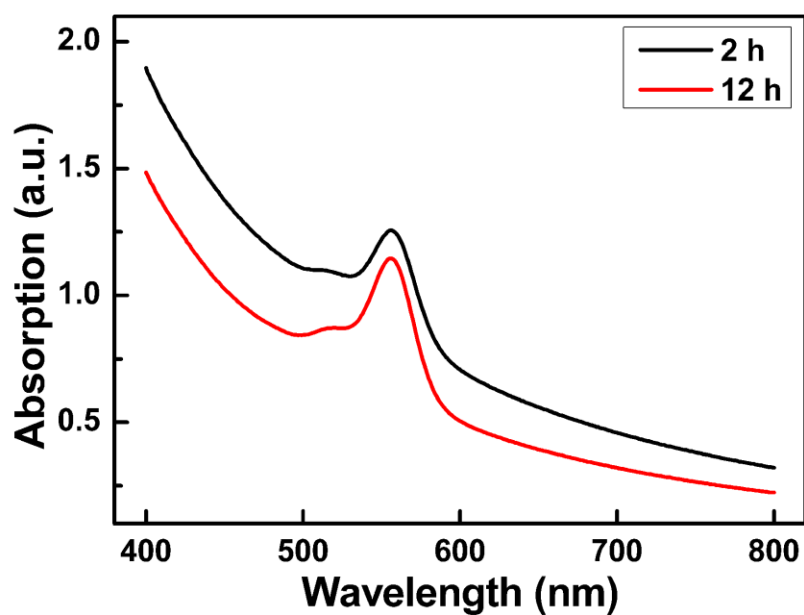

**Figure S8.** Absorption curves of the release system with 2 h and 12 h hydrogels respectively, after immersing in the DTT solution (10 mM, PBS) for 30 h.

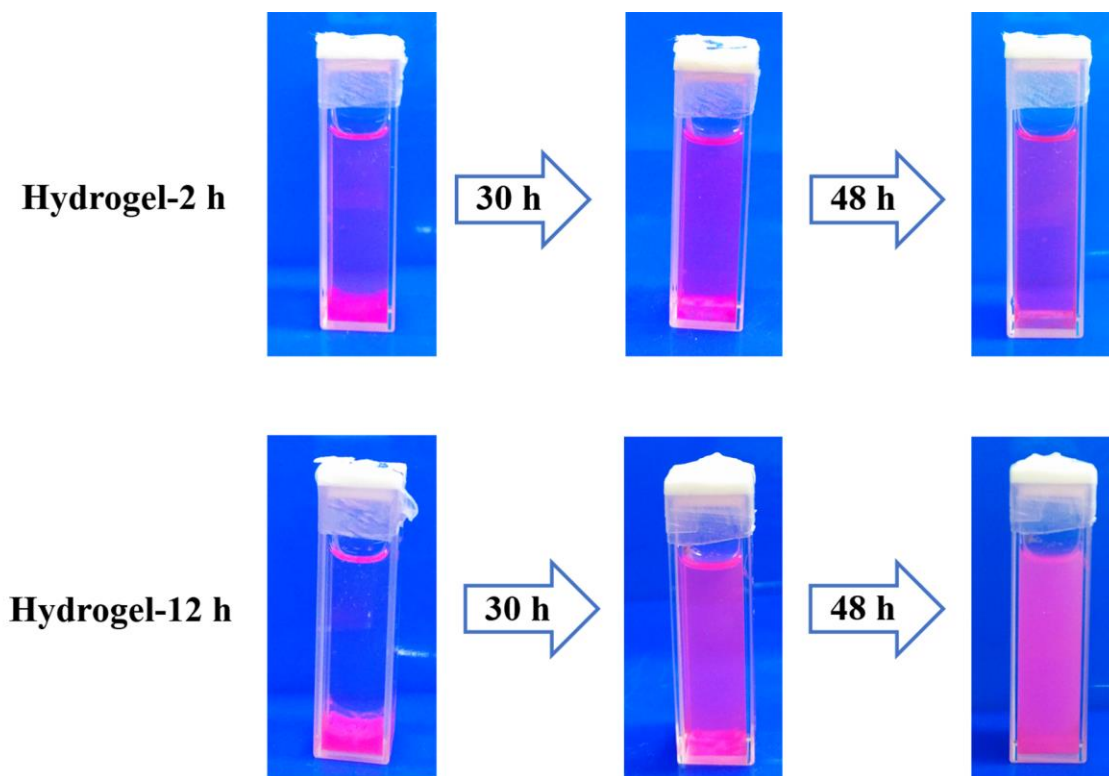

**Figure S9.** Images of the release system in DTT solution (10 mM, PBS).
